# Supplementary material for: Single-ion magnet behavior of Ln3+ encapsulated in carbon nanotubes: an ab initio insight
Source: Royal Society of Chemistry journal article supplement (doi:10.1039/d3dt01233f), 2023-01-01
Supplement: d3dt01233f1.pdf [file d3dt01233f1.pdf]

## Supporting Information

### **Single-ion magnet behavior of Ln<sup>3+</sup> encapsulated in carbon nanotube. An *ab initio* insight**

Dan Liu<sup>1\*</sup>, Xuefeng Guo<sup>1</sup>, Xiaoyong Zhang<sup>2</sup>, Abdullah A. Al-Kahtani<sup>3</sup>, Liviu F. Chibotaru<sup>4\*</sup>

<sup>1</sup>Institute of Flexible Electronics, Northwestern Polytechnical University, 127 West Youyi Road, Xi'an, 710072 Shaanxi, China

<sup>2</sup>Institute of Systems and Physical Biology, Shenzhen Bay Laboratory, Shenzhen 518055, China

<sup>3</sup>Chemistry Department, College of Science, King Saud University, P.O. Box 2455, Riyadh 11451, Saudi Arabia

<sup>4</sup>Theory of Nanomaterials Group, Katholieke Universiteit Leuven, Celestijnenlaan 200F, Leuven B-3001, Belgium

***Ab initio* insight: single ions magnet behavior of Ln<sup>3+</sup> encapsulated in carbon nanotube**

The diameters of DFT optimized pristine zigzag nanotubes and calculated ones for  $R_{CC} = 1.4 \text{ \AA}$  [1] are shown in Table S1. One can see an enlargement of the diameters of all CNTs of ca 0.2  $\text{\AA}$  upon optimization. The last row in Table S1 gives the diameter of the closest to Tb ring of carbon atoms in the fully optimized embedded CNT Tb<sup>3+</sup>@(5,0). The corresponding structural model used in ab initio calculations is shown in Fig. 1, while Fig. S1 gives similar structural models for non-optimized and diameter optimized only CNT fragments. These are used for the sake of identification of the role of structural distortions of C atoms surrounding the Ln<sup>3+</sup> ion in the observed multiplet spectra and magnetic anisotropy of embedded CNTs. The relevant structural distortions can be inferred from Tables S2 and S3.

**Table S1.** The diameters ( $\text{\AA}$ ) of non-optimized, optimized pristine and optimized embedded CNT.

| CNTs                                   | (5,0) | (6,0) | (7,0) |
|----------------------------------------|-------|-------|-------|
| Non-optimized                          | 3.91  | 4.70  | 5.48  |
| Optimized pristine                     | 4.08  | 4.84  | 5.60  |
| Fully optimized (closest C ring to Tb) | 4.20  | 4.94  | 5.68  |

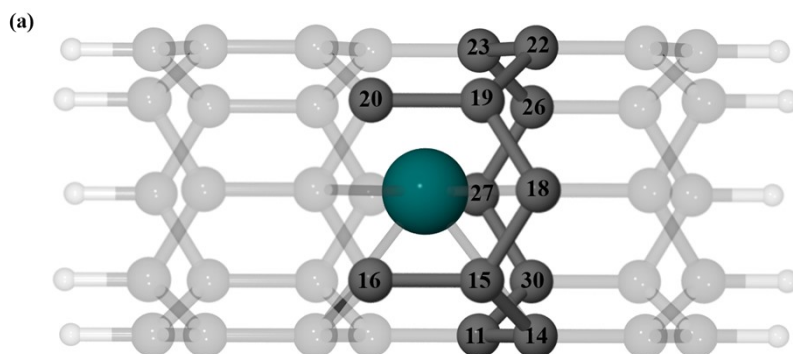

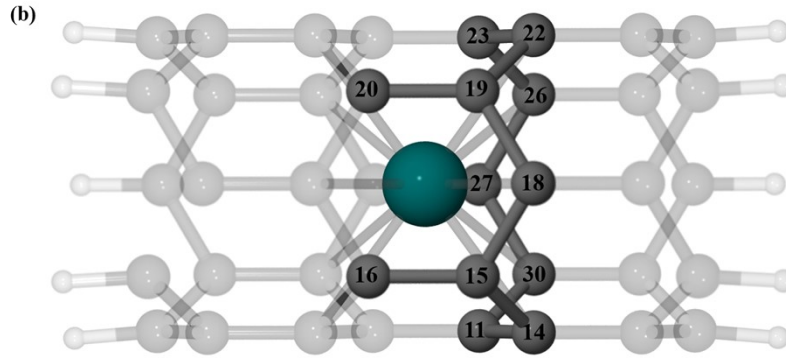

**Figure S1.** Structural models of  $\text{Tb}^{3+}$  embedded into (5,0) zigzag CNT with non-optimized (a) and partly optimized (b) nanotubes (see the text). The labelled black balls highlight nearest and next nearest carbon atoms to the  $\text{Tb}^{3+}$  ion.

**Table S2.** The distances ( $\text{\AA}$ ) between  $\text{Tb}^{3+}$  ion and the nearest and next nearest C atoms in non-optimized, CNT diameter optimized only and fully optimized (5,0) CNTs.

| $\text{Tb-C}_n$ | Non-optimized       | CNT diameter optimized only | Fully optimized |     |
|-----------------|---------------------|-----------------------------|-----------------|-----|
| nearest         | Tb- $\text{C}_{11}$ | 2.1                         | 2.2             | 2.3 |
|                 | Tb- $\text{C}_{15}$ | 2.1                         | 2.2             | 2.3 |
|                 | Tb- $\text{C}_{19}$ | 2.1                         | 2.2             | 2.3 |
|                 | Tb- $\text{C}_{23}$ | 2.1                         | 2.2             | 2.3 |
|                 | Tb- $\text{C}_{27}$ | 2.1                         | 2.2             | 2.3 |
| next-nearest    | Tb- $\text{C}_{14}$ | 2.4                         | 2.5             | 2.6 |
|                 | Tb- $\text{C}_{18}$ | 2.4                         | 2.5             | 2.6 |
|                 | Tb- $\text{C}_{22}$ | 2.4                         | 2.5             | 2.6 |
|                 | Tb- $\text{C}_{26}$ | 2.4                         | 2.5             | 2.6 |
|                 | Tb- $\text{C}_{30}$ | 2.4                         | 2.5             | 2.6 |

**Table S3.** The angles ( $^\circ$ ) between nearest C atoms and the  $\text{Tb}^{3+}$  ion in non-optimized, CNT diameter optimized only and fully optimized (5,0) CNTs.

| $\langle \text{C}_{n1}\text{C}_n\text{C}_{n3} \rangle$    | Non-optimized | CNT diameter optimized only | Fully optimized |
|-----------------------------------------------------------|---------------|-----------------------------|-----------------|
| $\langle \text{C}_{15}\text{C}_{18}\text{C}_{19} \rangle$ | 110.2         | 111.2                       | 117.6           |
| $\langle \text{C}_{18}\text{C}_{19}\text{C}_{20} \rangle$ | 120.4         | 119.8                       | 117.8           |

|                                      |       |       |       |
|--------------------------------------|-------|-------|-------|
| $\langle C_{16}C_{15}C_{18} \rangle$ | 120.4 | 119.8 | 117.8 |
|--------------------------------------|-------|-------|-------|

**Table S4.** The Mulliken charges on  $Tb^{3+}$  ion, the nearest and next nearest C atoms in non-optimized, CNT diameter optimized only and fully optimized (5,0) CNTs.

| Atoms        | Non-optimized | CNT diameter optimized only | Fully optimized |       |
|--------------|---------------|-----------------------------|-----------------|-------|
| $Tb^{3+}$    | 0.96          | 1.12                        | 1.26            |       |
| nearest      | $C_{11}$      | -0.08                       | -0.09           | -0.05 |
|              | $C_{15}$      | -0.09                       | -0.10           | -0.06 |
|              | $C_{19}$      | -0.11                       | -0.11           | -0.05 |
|              | $C_{23}$      | -0.11                       | -0.11           | -0.06 |
|              | $C_{27}$      | -0.09                       | -0.10           | -0.06 |
| next-nearest | $C_{14}$      | 0.07                        | 0.05            | -0.01 |
|              | $C_{18}$      | 0.08                        | 0.07            | 0.00  |
|              | $C_{22}$      | 0.08                        | 0.07            | -0.05 |
|              | $C_{26}$      | 0.08                        | 0.07            | 0.02  |
|              | $C_{30}$      | 0.07                        | 0.06            | -0.05 |

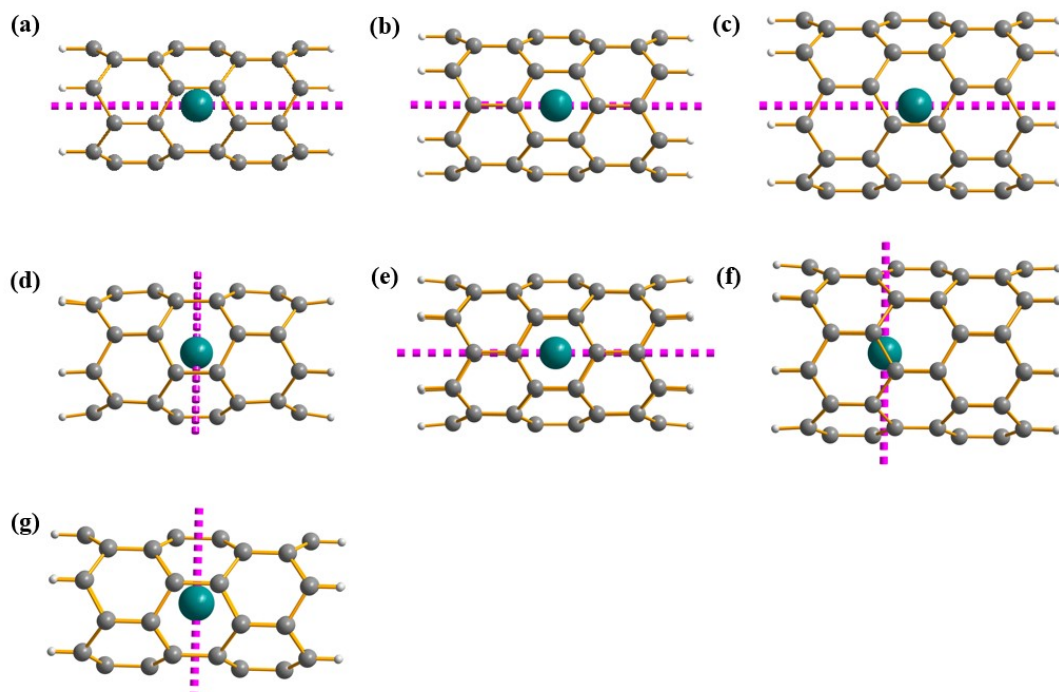

**Figure S2.** Position of  $Tb^{3+}$  in the (5,0), (6,0) and (7,0) CNTs (top row are non-optimized, middle row are fully optimized and bottom is CNT diameter optimized only)

and main magnetic axis (pink arrow). Color code: Tb<sup>3+</sup> (green), H (gray) and C (dark gray).

**Table S5.** Energies of the lowest doublets (cm<sup>-1</sup>) of Tb<sup>3+</sup> in (5,0), (6,0) and (7,0) CNTs (non-optimized) and (5,0) CNT (CNT diameter optimized only).

| Spin-orbit energies, cm <sup>-1</sup> |                                      |                        |                        |
|---------------------------------------|--------------------------------------|------------------------|------------------------|
| (5,0)<br>Non-optimized                | (5,0)<br>CNT diameter optimized only | (6,0)<br>Non-optimized | (7,0)<br>Non-optimized |
| 0.0                                   | 0.0                                  | 0.0                    | 0.0                    |
| 2.5                                   | 5.5                                  | 6.3                    | 0.0                    |
| 48.4                                  | 19.8                                 | 123.7                  | 327.5                  |
| 58.7                                  | 26.7                                 | 123.8                  | 327.5                  |
| 78.2                                  | 96.0                                 | 143.1                  | 613.9                  |
| 81.8                                  | 97.4                                 | 144.5                  | 613.9                  |
| 172.5                                 | 198.9                                | 144.5                  | 850.4                  |
| 184.3                                 | 203.6                                | 156.9                  | 853.0                  |
| 248.4                                 | 219.3                                | 239.9                  | 1032.6                 |
| 581.6                                 | 411.0                                | 240.0                  | 1032.6                 |
| 611.2                                 | 412.9                                | 292.3                  | 1145.7                 |
| 622.3                                 | 418.4                                | 295.4                  | 1149.2                 |
| 651.4                                 | 422.3                                | 295.6                  | 1187.2                 |

**Table S6.** The g tensors of the lowest doublets of Tb<sup>3+</sup> in (5,0), (6,0) and (7,0) CNTs (non-optimized) and (5,0) CNT (CNT diameter optimized only).

| Doublets |                | (5,0)<br>Non-optimized | (5,0)<br>CNT diameter optimized only | (6,0)<br>Non-optimized | (7,0)<br>Non-optimized |
|----------|----------------|------------------------|--------------------------------------|------------------------|------------------------|
|          |                | <b>1</b>               | g <sub>x</sub>                       | 0.0                    | 0.0                    |
|          | g <sub>y</sub> | 0.0                    | 0.0                                  | 0.0                    | 0.0                    |
|          | g <sub>z</sub> | 17.4                   | 15.6                                 | 17.2                   | 17.9                   |
| <b>2</b> | g <sub>x</sub> | 0.0                    | 0.0                                  | 0.0                    | 0.0                    |
|          | g <sub>y</sub> | 0.0                    | 0.0                                  | 0.0                    | 0.0                    |
|          | g <sub>z</sub> | 15.8                   | 15.1                                 | 0.5                    | 14.6                   |
| <b>3</b> | g <sub>x</sub> | 0.0                    | 0.0                                  | 0.0                    | 0.0                    |
|          | g <sub>y</sub> | 0.0                    | 0.0                                  | 0.0                    | 0.0                    |
|          | g <sub>z</sub> | 16.8                   | 17.7                                 | 0.1                    | 11.4                   |

|   |       |     |      |      |     |
|---|-------|-----|------|------|-----|
| 4 | $g_x$ | 0.0 | 0.0  | 0.0  | 0.0 |
|   | $g_y$ | 0.0 | 0.0  | 0.0  | 0.0 |
|   | $g_z$ | 9.9 | 12.1 | 11.7 | 8.4 |

**Table S7.** *Ab initio* results for the  $J=6$  multiplet of  $Tb^{3+}$  in (5,0) CNT (non-optimized).

| Spin-orbit singlets | $E/cm^{-1}$ | Wavefunction                                           |
|---------------------|-------------|--------------------------------------------------------|
| 1                   | 0.0         | 95.0%  $\pm 6$ )                                       |
| 2                   | 2.5         | 99.8%  $\pm 6$ )                                       |
| 3                   | 48.4        | 39.4%  $\pm 1$ ) + 39.8%  $\pm 3$ ) + 20.8%  $\pm 5$ ) |
| 4                   | 58.7        | 18.6% 0) + 47.4%  $\pm 2$ ) + 29.0%  $\pm 4$ )         |
| 5                   | 78.2        | 42.6%  $\pm 1$ ) + 39.0%  $\pm 3$ ) + 18.4%  $\pm 5$ ) |
| 6                   | 81.8        | 22.1% 0) + 49.6%  $\pm 2$ ) + 28.4%  $\pm 4$ )         |
| 7                   | 172.5       | 16.8%  $\pm 3$ ) + 79.4%  $\pm 5$ )                    |
| 8                   | 184.3       | 19.6%  $\pm 3$ ) + 76.6%  $\pm 5$ )                    |
| 9                   | 248.4       | 99.8%  $\pm 4$ )                                       |
| 10                  | 581.6       | 58.5% 0) + 41.4%  $\pm 4$ )                            |
| 11                  | 611.2       | 56.8%  $\pm 1$ ) + 40.6%  $\pm 3$ )                    |
| 12                  | 622.3       | 53.6%  $\pm 1$ ) + 44.2%  $\pm 3$ )                    |
| 13                  | 651.4       | 99.8%  $\pm 2$ )                                       |

**Table S8.** *Ab initio* results for the  $J=6$  multiplet of  $Tb^{3+}$  in (5,0) CNT (CNT diameter optimized only).

| Spin-orbit singlets | $E/cm^{-1}$ | Wavefunction                                           |
|---------------------|-------------|--------------------------------------------------------|
| 1                   | 0.0         | 10.8% 0) + 10.0%  $\pm 2$ ) + 73.0%  $\pm 6$ )         |
| 2                   | 5.5         | 93.6%  $\pm 6$ )                                       |
| 3                   | 19.8        | 85.6%  $\pm 1$ ) + 13.2%  $\pm 3$ )                    |
| 4                   | 26.7        | 38.3% 0) + 39.8%  $\pm 2$ ) + 20.8%  $\pm 6$ )         |
| 5                   | 96.0        | 77.0%  $\pm 1$ ) + 20.0%  $\pm 3$ )                    |
| 6                   | 97.4        | 46.0% 0) + 48.0%  $\pm 2$ )                            |
| 7                   | 198.9       | 12.0%  $\pm 1$ ) + 55.8%  $\pm 3$ ) + 27.4%  $\pm 5$ ) |
| 8                   | 203.6       | 85.2%  $\pm 2$ ) + 9.6%  $\pm 4$ )                     |

|    |       |                                         |
|----|-------|-----------------------------------------|
| 9  | 219.3 | 20.2%  ± 1) + 46.4%  ± 3) + 31.4%  ± 5) |
| 10 | 411.0 | 9.2%  ± 2) + 6.0%  ± 3) + 75.2%  ± 4)   |
| 11 | 412.9 | 81.6%  ± 4)                             |
| 12 | 418.4 | 23.0%  ± 3) + 9.2%  ± 4) + 64.0%  ± 5)  |
| 13 | 422.3 | 27.4%  ± 3) + 63.4%  ± 5)               |

**Table S9.** *Ab initio* results for the  $J=6$  multiplet of  $Tb^{3+}$  in (6,0) CNT (non-optimized).

| Spin-orbit singlets | $E/cm^{-1}$ | Wavefunction              |
|---------------------|-------------|---------------------------|
| 1                   | 0.0         | 95.2%  ± 6)               |
| 2                   | 6.3         | 100%  ± 6)                |
| 3                   | 123.7       | 79.8%  ± 1) + 20.2%  ± 5) |
| 4                   | 123.8       | 79.6%  ± 1) + 20.4%  ± 5) |
| 5                   | 143.1       | 95.0% 0)                  |
| 6                   | 144.5       | 77.4%  ± 2) + 22.6%  ± 4) |
| 7                   | 145.0       | 77.4%  ± 2) + 22.6%  ± 4) |
| 8                   | 156.9       | 100%  ± 3)                |
| 9                   | 239.9       | 20.2%  ± 1) + 79.8%  ± 5) |
| 10                  | 240.0       | 22.4%  ± 1) + 79.6%  ± 5) |
| 11                  | 292.3       | 100%  ± 3)                |
| 12                  | 295.4       | 22.6%  ± 2) + 77.4%  ± 4) |
| 13                  | 295.6       | 22.6%  ± 2) + 77.4%  ± 4) |

**Table S10.** *Ab initio* results for the  $J=6$  multiplet of  $Tb^{3+}$  in (7,0) CNT (non-optimized).

| Spin-orbit singlets | $E/cm^{-1}$ | Wavefunction |
|---------------------|-------------|--------------|
| 1                   | 0.0         | 100%  ± 6)   |
| 2                   | 0.0         | 100%  ± 6)   |
| 3                   | 327.5       | 100%  ± 5)   |
| 4                   | 327.5       | 100%  ± 5)   |
| 5                   | 613.9       | 100%  ± 4)   |
| 6                   | 613.9       | 100%  ± 4)   |

|    |        |               |
|----|--------|---------------|
| 7  | 850.4  | 100%  $\pm 3$ |
| 8  | 853.0  | 100%  $\pm 3$ |
| 9  | 1032.6 | 100%  $\pm 2$ |
| 10 | 1032.6 | 100%  $\pm 2$ |
| 11 | 1145.7 | 100%  $\pm 1$ |
| 12 | 1149.2 | 100%  $\pm 1$ |
| 13 | 1187.2 | 100% 0        |

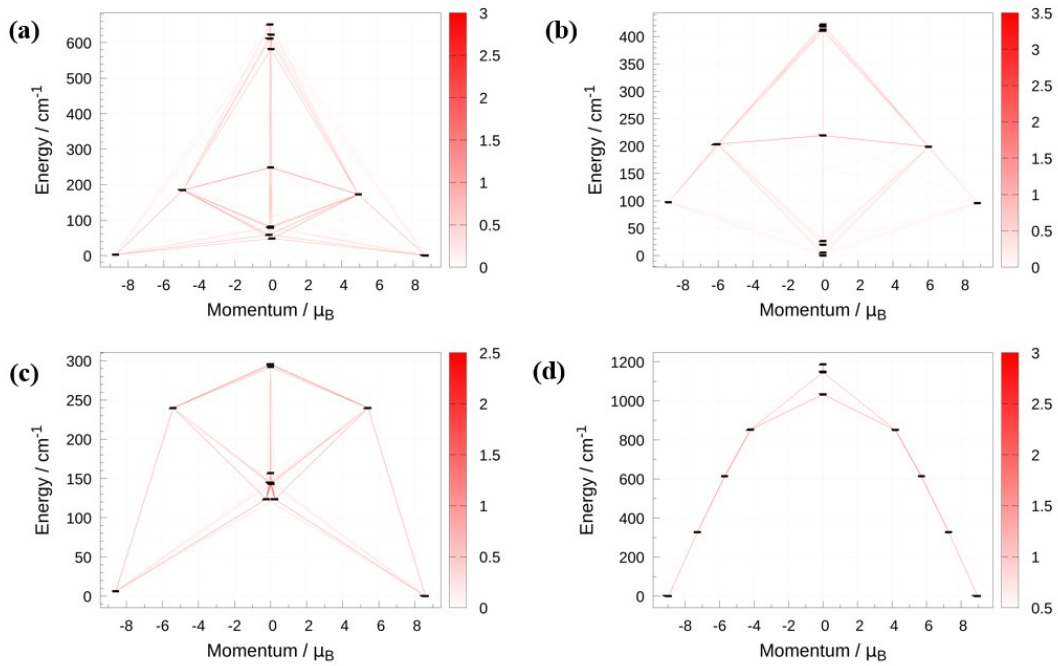

**Figure S3.** The relaxation paths for reversal of magnetization of  $\text{Tb}^{3+}$  in non-optimized (5,0), (6,0) and (7,0) CNTs [(a), (c), and (d), respectively] and for (5,0) CNT diameter optimized only (b).

**Table S11.** *Ab initio* results for the  $J=6$  multiplet of  $\text{Tb}^{3+}$  in (5,0) CNT (fully optimized).

| Spin-orbit singlets | $E/\text{cm}^{-1}$ | Wavefunction                   |
|---------------------|--------------------|--------------------------------|
| 1                   | 0.0                | 99.0%  $\pm 6$                 |
| 2                   | 0.5                | 99.4%  $\pm 6$                 |
| 3                   | 82.0               | 8.8%  $\pm 3$ + 85.8%  $\pm 5$ |
| 4                   | 89.5               | 96.4%  $\pm 5$                 |
| 5                   | 118.2              | 16.2% 0 + 81.6%  $\pm 4$       |



|    |       |                                                        |
|----|-------|--------------------------------------------------------|
| 6  | 144.7 | 30.0%  $\pm 2$ ) + 69.8%  $\pm 4$ )                    |
| 7  | 155.1 | 31.4%  $\pm 1$ ) + 68.4%  $\pm 3$ )                    |
| 8  | 188.4 | 13.4%  $\pm 1$ ) + 73.2%  $\pm 3$ ) + 13.2%  $\pm 5$ ) |
| 9  | 190.9 | 69.2%  $\pm 2$ ) + 29.4%  $\pm 4$ )                    |
| 10 | 370.0 | 64.2%  $\pm 1$ ) + 30.2%  $\pm 3$ )                    |
| 11 | 370.2 | 29.0% 0) + 56.4%  $\pm 2$ ) + 12.0%  $\pm 4$ )         |
| 12 | 382.5 | 19.8%  $\pm 3$ ) + 81.2%  $\pm 1$ )                    |
| 13 | 382.5 | 5.6%  $\pm 4$ ) + 53.8% 0) + 40.2%  $\pm 2$ )          |

**Table S12.** *Ab initio* results for the  $J=6$  multiplet of  $Tb^{3+}$  in (6,0) CNT (fully optimized).

| Spin-orbit singlets | $E/cm^{-1}$ | Wavefunction                        |
|---------------------|-------------|-------------------------------------|
| 1                   | 0.0         | 94.6%  $\pm 6$ )                    |
| 2                   | 4.7         | 100%  $\pm 6$ )                     |
| 3                   | 85.9        | 88.2%  $\pm 1$ ) + 11.8%  $\pm 5$ ) |
| 4                   | 87.4        | 87.6%  $\pm 1$ ) + 12.2%  $\pm 5$ ) |
| 5                   | 95.3        | 92.8% 0)                            |
| 6                   | 102.2       | 82.6%  $\pm 2$ ) + 17.4%  $\pm 4$ ) |
| 7                   | 103.7       | 81.6%  $\pm 2$ ) + 16.6%  $\pm 4$ ) |
| 8                   | 114.7       | 99.8%  $\pm 3$ )                    |
| 9                   | 183.2       | 11.8%  $\pm 1$ ) + 88.0%  $\pm 5$ ) |
| 10                  | 183.4       | 12.2%  $\pm 1$ ) + 87.8%  $\pm 5$ ) |
| 11                  | 204.4       | 99.8%  $\pm 3$ )                    |
| 12                  | 213.6       | 16.8%  $\pm 2$ ) + 83.2%  $\pm 4$ ) |
| 13                  | 214.6       | 17.4%  $\pm 2$ ) + 82.6%  $\pm 4$ ) |

**Table S13.** *Ab initio* results for the  $J=6$  multiplet of  $Tb^{3+}$  in (7,0) CNT (fully optimized).

| Spin-orbit singlets | $E/cm^{-1}$ | Wavefunction                                           |
|---------------------|-------------|--------------------------------------------------------|
| 1                   | 0.0         | 11.0%  $\pm 2$ ) + 19.4%  $\pm 4$ ) + 65.2%  $\pm 6$ ) |
| 2                   | 15.1        | 13.8%  $\pm 4$ ) + 84.2%  $\pm 6$ )                    |
| 3                   | 49.0        | 31.2%  $\pm 1$ ) + 34.6%  $\pm 3$ ) + 34.4%  $\pm 5$ ) |

|    |        |                                                                           |
|----|--------|---------------------------------------------------------------------------|
| 4  | 118.8  | $26.2\% \pm 3\rangle + 71.0\% \pm 5\rangle$                               |
| 5  | 123.3  | $21.3\% 0\rangle + 36.4\% \pm 2\rangle + 11.6\% \pm 4\rangle + 30.6\%$    |
| 6  | 265.4  | $24.2\% \pm 2\rangle + 51.2\% \pm 4\rangle + 13.6\% \pm 6\rangle$         |
| 7  | 269.3  | $33.8\% \pm 1\rangle + 52.4\% \pm 5\rangle$                               |
| 8  | 484.9  | $13.6\% \pm 1\rangle + 49.6\% \pm 3\rangle + 7.8\% \pm 4\rangle + 25.0\%$ |
| 9  | 485.3  | $21.5\% 0\rangle + 6.0\% \pm 1\rangle + 6.8\% \pm 3\rangle + 57.0\% \pm$  |
| 10 | 808.0  | $16.0\% \pm 1\rangle + 34.2\% \pm 2\rangle + 32.0\% \pm 3\rangle + 13.8$  |
| 11 | 808.1  | $15.0\% \pm 1\rangle + 36.4\% \pm 2\rangle + 30.2\% \pm 3\rangle + 14.8$  |
| 12 | 1477.5 | $21.9\% 0\rangle + 46.0\% \pm 1\rangle + 20.0\% \pm 2\rangle + 9.8\% \pm$ |
| 13 | 1477.6 | $28.0\% 0\rangle + 35.8\% \pm 1\rangle + 25.8\% \pm 2\rangle + 7.6\% \pm$ |

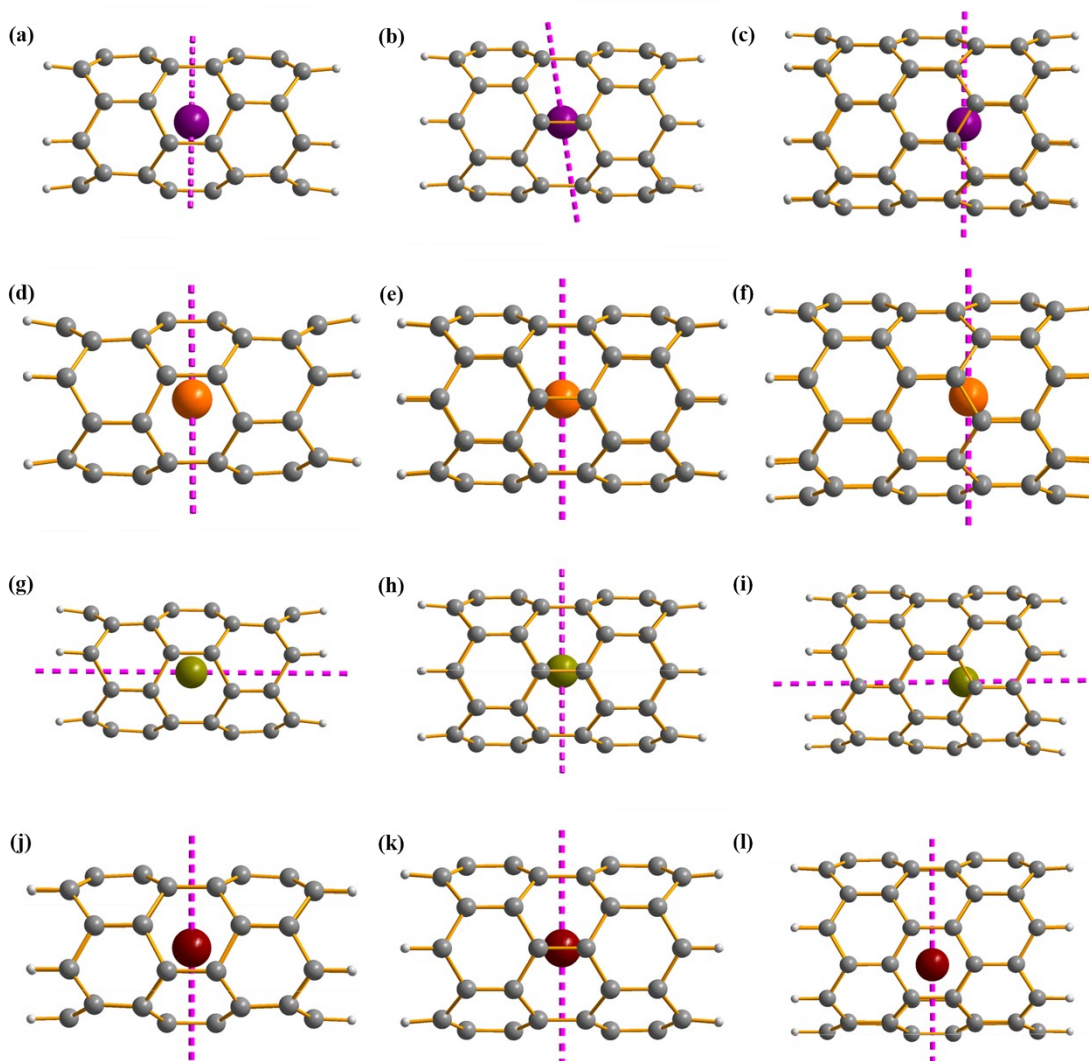

**Figure S4.** Structure of  $\text{Ln}^{3+}$  ( $\text{Ln}=\text{Dy}, \text{Ho}, \text{Er}$  and  $\text{Tm}$  top to bottom) in the (5,0), (6,0)

and (7,0) CNT (left to right) and the main magnetic axis of the corresponding ground doublet (pink arrow). Color code: Dy<sup>3+</sup> (violet), Ho<sup>3+</sup> (orange), Er<sup>3+</sup> (dark yellow), Tm<sup>3+</sup> (dark red), H (gray) and C (dark gray).

**Table S14.** *Ab initio* results for the  $J=15/2$  multiplet of Dy<sup>3+</sup> in (5,0) CNT.

| KDs | $E/\text{cm}^{-1}$ | Wavefunction                                                                                                                                                             |
|-----|--------------------|--------------------------------------------------------------------------------------------------------------------------------------------------------------------------|
| 1   | 0.0                | $7.5\% \pm 3/2\rangle + 7.6\% \pm 7/2\rangle + 8.1\% \pm 9/2\rangle + 25.2\% \pm 13/2\rangle + 46.2\% \pm 15/2\rangle$                                                   |
| 2   | 3.6                | $10.0\% \pm 1/2\rangle + 8.9\% \pm 3/2\rangle + 16.7\% \pm 5/2\rangle + 19.7\% \pm 7/2\rangle + 17.5\% \pm 9/2\rangle + 11.7\% \pm 13/2\rangle + 11.8\% \pm 15/2\rangle$ |
| 3   | 85.5               | $19.3\% \pm 1/2\rangle + 9.1\% \pm 5/2\rangle + 16.7\% \pm 7/2\rangle + 29.7\% \pm 9/2\rangle + 18.5\% \pm 11/2\rangle$                                                  |
| 4   | 116.2              | $18.3\% \pm 3/2\rangle + 38.3\% \pm 5/2\rangle + 26.4\% \pm 7/2\rangle + 16.1\% \pm 11/2\rangle$                                                                         |
| 5   | 143.4              | $14.8\% \pm 1/2\rangle + 19.0\% \pm 3/2\rangle + 12.8\% \pm 9/2\rangle + 45.4\% \pm 11/2\rangle$                                                                         |
| 6   | 368.6              | $15.6\% \pm 3/2\rangle + 23.0\% \pm 5/2\rangle + 13.2\% \pm 7/2\rangle + 20.2\% \pm 11/2\rangle + 9.8\% \pm 13/2\rangle$                                                 |
| 7   | 425.0              | $7.0\% \pm 1/2\rangle + 15.2\% \pm 9/2\rangle + 40.1\% \pm 13/2\rangle + 22.5\% \pm 15/2\rangle$                                                                         |
| 8   | 477.0              | $41.7\% \pm 1/2\rangle + 22.9\% \pm 3/2\rangle + 10.4\% \pm 5/2\rangle + 10.1\% \pm 7/2\rangle$                                                                          |

**Table S15.** *Ab initio* results for the  $J=15/2$  multiplet of Dy<sup>3+</sup> in (6,0) CNT.

| KDs | $E/\text{cm}^{-1}$ | Wavefunction                                                                                                                                    |
|-----|--------------------|-------------------------------------------------------------------------------------------------------------------------------------------------|
| 1   | 0.0                | $8.4\% \pm 1/2\rangle + 8.4\% \pm 5/2\rangle + 18.4\% \pm 9/2\rangle + 29.7\% \pm 11/2\rangle + 25.1\% \pm 13/2\rangle$                         |
| 2   | 42.4               | $11.7\% \pm 1/2\rangle + 17.0\% \pm 5/2\rangle + 29.3\% \pm 7/2\rangle + 20.8\% \pm 9/2\rangle + 14.6\% \pm 11/2\rangle$                        |
| 3   | 49.6               | $6.4\% \pm 9/2\rangle + 31.6\% \pm 11/2\rangle + 48.5\% \pm 13/2\rangle + 11.2\% \pm 15/2\rangle$                                               |
| 4   | 64.3               | $6.4\% \pm 1/2\rangle + 20.8\% \pm 3/2\rangle + 23.1\% \pm 5/2\rangle + 21.9\% \pm 7/2\rangle + 22.6\% \pm 9/2\rangle$                          |
| 5   | 272.4              | $5.4\% \pm 1/2\rangle + 4.9\% \pm 5/2\rangle + 4.0\% \pm 7/2\rangle + 12.0\% \pm 13/2\rangle + 65.6\% \pm 15/2\rangle$                          |
| 6   | 295.1              | $38.0\% \pm 1/2\rangle + 35.0\% \pm 3/2\rangle + 7.1\% \pm 5/2\rangle + 6.7\% \pm 11/2\rangle + 6.9\% \pm 13/2\rangle$                          |
| 7   | 338.3              | $22.8\% \pm 1/2\rangle + 8.1\% \pm 3/2\rangle + 23.7\% \pm 5/2\rangle + 12.4\% \pm 7/2\rangle + 6.3\% \pm 11/2\rangle + 17.4\% \pm 15/2\rangle$ |

|   |       |                                                                                                                        |
|---|-------|------------------------------------------------------------------------------------------------------------------------|
| 8 | 360.7 | $6.6\% \pm 1/2\rangle + 22.5\% \pm 3/2\rangle + 21.4\% \pm 5/2\rangle + 27.5\% \pm 7/2\rangle + 19.0\% \pm 9/2\rangle$ |
|---|-------|------------------------------------------------------------------------------------------------------------------------|

**Table S16.** *Ab initio* results for the  $J=15/2$  multiplet of  $\text{Dy}^{3+}$  in (7,0) CNT.

| KDs | $E/\text{cm}^{-1}$ | Wavefunction                                                                                                                                      |
|-----|--------------------|---------------------------------------------------------------------------------------------------------------------------------------------------|
| 1   | 0.0                | $6.1\% \pm 7/2\rangle + 17.9\% \pm 11/2\rangle + 69.9\% \pm 15/2\rangle$                                                                          |
| 2   | 57.8               | $11.8\% \pm 1/2\rangle + 6.8\% \pm 3/2\rangle + 16.8\% \pm 5/2\rangle + 23.7\% \pm 9/2\rangle + 30.6\% \pm 13/2\rangle + 7.7\% \pm 15/2\rangle$   |
| 3   | 145.1              | $9.2\% \pm 1/2\rangle + 17.9\% \pm 3/2\rangle + 18.3\% \pm 7/2\rangle + 6.9\% \pm 11/2\rangle + 30.6\% \pm 13/2\rangle + 11.6\% \pm 15/2\rangle$  |
| 4   | 302.7              | $12.3\% \pm 1/2\rangle + 18.0\% \pm 5/2\rangle + 11.4\% \pm 7/2\rangle + 27.0\% \pm 11/2\rangle + 20.6\% \pm 13/2\rangle + 7.6\% \pm 15/2\rangle$ |
| 5   | 534.1              | $20.1\% \pm 3/2\rangle + 8.9\% \pm 5/2\rangle + 22.7\% \pm 9/2\rangle + 27.4\% \pm 11/2\rangle + 12.4\% \pm 13/2\rangle$                          |
| 6   | 839.3              | $18.9\% \pm 1/2\rangle + 5.0\% \pm 5/2\rangle + 24.5\% \pm 7/2\rangle + 28.6\% \pm 9/2\rangle + 15.5\% \pm 11/2\rangle$                           |
| 7   | 1162.0             | $18.9\% \pm 3/2\rangle + 31.4\% \pm 5/2\rangle + 27.2\% \pm 7/2\rangle + 14.3\% \pm 9/2\rangle$                                                   |
| 8   | 1367.5             | $39.5\% \pm 1/2\rangle + 30.7\% \pm 3/2\rangle + 18.3\% \pm 5/2\rangle + 8.2\% \pm 7/2\rangle$                                                    |

**Table S17.** *Ab initio* results for the  $J=8$  multiplet of  $\text{Ho}^{3+}$  in (5,0) CNT.

| Spin-orbit singlets | $E/\text{cm}^{-1}$ | Wavefunction                                                                                                  |
|---------------------|--------------------|---------------------------------------------------------------------------------------------------------------|
| 1                   | 0.0                | $17.4\% \pm 6\rangle + 77.0\% \pm 8\rangle$                                                                   |
| 2                   | 0.5                | $17.2\% \pm 6\rangle + 77.4\% \pm 8\rangle$                                                                   |
| 3                   | 85.8               | $10.4\% \pm 2\rangle + 28.8\% \pm 3\rangle + 23.2\% \pm 4\rangle + 22.6\% \pm 5\rangle + 7.2\% \pm 6\rangle$  |
| 4                   | 85.8               | $14.4\% \pm 2\rangle + 20.2\% \pm 3\rangle + 32.6\% \pm 4\rangle + 16.6\% \pm 5\rangle + 10.4\% \pm 6\rangle$ |
| 5                   | 117.0              | $11.2\% \pm 1\rangle + 80.6\% \pm 5\rangle + 7.0\% \pm 7\rangle$                                              |
| 6                   | 119.5              | $10.2\% \pm 2\rangle + 67.4\% \pm 4\rangle + 21.6\% \pm 6\rangle$                                             |
| 7                   | 121.9              | $26.6\% \pm 3\rangle + 33.4\% \pm 5\rangle + 36.8\% \pm 7\rangle$                                             |
| 8                   | 122.1              | $56.0\% \pm 3\rangle + 8.6\% \pm 5\rangle + 31.6\% \pm 7\rangle$                                              |

|    |       |                                                                           |
|----|-------|---------------------------------------------------------------------------|
| 9  | 163.2 | 27.7% 0⟩ + 44.6% ± 2⟩ + 20.0% ± 4⟩ + 6.2% ± 8⟩                            |
| 10 | 196.5 | 40.8% ± 2⟩ + 25.0% ± 4⟩ + 16.4% ± 6⟩ + 14.8% ± 8⟩                         |
| 11 | 200.1 | 64.0% ± 1⟩ + 29.2% ± 7⟩                                                   |
| 12 | 256.8 | 5.4% ± 1⟩ + 25.4% ± 3⟩ + 5.6% ± 5⟩ + 10.6% ± 6⟩ + 44.4% ± 7⟩              |
| 13 | 257.2 | 9.6% 0⟩ + 9.6% ± 4⟩ + 44.4% ± 6⟩ + 10.8% ± 7⟩ + 12.6% ± 8⟩                |
| 14 | 292.5 | 15.0% ± 1⟩ + 9.4% ± 2⟩ + 26.8% ± 3⟩ + 12.4% ± 5⟩ + 8.6% ± 6⟩ + 26.2% ± 7⟩ |
| 15 | 292.9 | 37.4% ± 2⟩ + 6.6% ± 3⟩ + 35.4% ± 6⟩ + 6.2% ± 7⟩ + 6.0% ± 8⟩               |
| 16 | 328.4 | 14.6% 0⟩ + 6.0% ± 2⟩ + 62.8% ± 1⟩ + 10.4% ± 5⟩                            |
| 17 | 328.4 | 44.2% 0⟩ + 20.6% ± 1⟩ + 18.2% ± 2⟩ + 6.0% ± 4⟩ + 6.8% ± 6⟩                |

**Table S18.** *Ab initio* results for the  $J=8$  multiplet of  $\text{Ho}^{3+}$  in (6,0) CNT.

| Spin-orbit singlets | $E/\text{cm}^{-1}$ | Wavefunction                                                  |
|---------------------|--------------------|---------------------------------------------------------------|
| 1                   | 0.0                | 24.8% ± 1⟩ + 6.6% ± 3⟩ + 57.2% ± 7⟩                           |
| 2                   | 15.3               | 7.2% ± 3⟩ + 83.8% ± 7⟩                                        |
| 3                   | 17.1               | 33.7% 0⟩ + 24.6% ± 2⟩ + 32.0% ± 6⟩                            |
| 4                   | 76.0               | 50.6% ± 1⟩ + 9.4% ± 2⟩ + 8.0% ± 6⟩ + 28.0% ± 7⟩               |
| 5                   | 76.5               | 5.8% ± 2⟩ + 11.4% ± 5⟩ + 61.8% ± 7⟩ + 10.6% ± 8⟩              |
| 6                   | 142.4              | 23.7% 0⟩ + 8.6% ± 5⟩ + 38.4% ± 6⟩ + 9.8% ± 8⟩                 |
| 7                   | 269.8              | 20.9% 0⟩ + 44.4% ± 1⟩ + 20.6% ± 2⟩                            |
| 8                   | 270.1              | 16.6% 0⟩ + 31.4% ± 1⟩ + 25.6% ± 2⟩ + 15.0% ± 3⟩ + 8.8% ± 4⟩   |
| 9                   | 284.5              | 13.4% ± 1⟩ + 17.0% ± 3⟩ + 15.6% ± 4⟩ + 37.4% ± 5⟩ + 6.6% ± 6⟩ |
| 10                  | 342.6              | 11.2% ± 1⟩ + 14.8% ± 3⟩ + 13.6% ± 4⟩ + 49.4% ± 5⟩ + 5.8% ± 6⟩ |
| 11                  | 342.7              | 7.2% ± 1⟩ + 57.8% ± 2⟩ + 15.4% ± 3⟩ + 11.0% ± 4⟩ + 6.6% ± 8⟩  |
| 12                  | 481.4              | 13.2% ± 2⟩ + 33.8% ± 4⟩ + 20.6% ± 6⟩ + 25.6% ± 8⟩             |

|    |       |                                                                          |
|----|-------|--------------------------------------------------------------------------|
| 13 | 501.6 | 7.4%  $\pm 2$ ) + 13.8%  $\pm 4$ ) + 17.8%  $\pm 6$ ) + 52.8%  $\pm 8$ ) |
| 14 | 502.6 | 6.2%  $\pm 2$ ) + 47.6%  $\pm 3$ ) + 38.8%  $\pm 5$ )                    |
| 15 | 559.4 | 33.4%  $\pm 4$ ) + 5.0%  $\pm 5$ ) + 54.4%  $\pm 8$ )                    |
| 16 | 559.7 | 8.4%  $\pm 2$ ) + 58.4%  $\pm 3$ ) + 26.8%  $\pm 5$ )                    |
| 17 | 583.0 | 9.8%  $\pm 2$ ) + 49.2%  $\pm 4$ ) + 5.0%  $\pm 5$ ) + 29.4%  $\pm 8$ )  |

**Table S19.** *Ab initio* results for the  $J=8$  multiplet of  $\text{Ho}^{3+}$  in (7,0) CNT.

| Spin-orbit singlets | $E/\text{cm}^{-1}$ | Wavefunction                                                                                                   |
|---------------------|--------------------|----------------------------------------------------------------------------------------------------------------|
| 1                   | 0.0                | 11.4%  $\pm 2$ ) + 16.0%  $\pm 4$ ) + 19.0%  $\pm 6$ ) + 47.0%  $\pm 8$ )                                      |
| 2                   | 21.0               | 8.0%  $\pm 4$ ) + 17.2%  $\pm 6$ ) + 71.0%  $\pm 8$ )                                                          |
| 3                   | 36.4               | 24.0%  $\pm 1$ ) + 28.6%  $\pm 3$ ) + 26.8%  $\pm 5$ ) + 18.4%  $\pm 7$ )                                      |
| 4                   | 101.6              | 17.2%  $\pm 3$ ) + 33.2%  $\pm 5$ ) + 34.8%  $\pm 7$ )                                                         |
| 5                   | 107.7              | 10.5% 0) + 20.4%  $\pm 2$ ) + 14.4%  $\pm 4$ ) + 9.0%  $\pm 7$ ) + 40.2%  $\pm 8$ )                            |
| 6                   | 180.4              | 7.4%  $\pm 1$ ) + 10.6%  $\pm 2$ ) + 27.2%  $\pm 4$ ) + 17.4%  $\pm 6$ ) + 14.8%  $\pm 7$ ) + 19.2%  $\pm 8$ ) |
| 7                   | 249.4              | 21.6%  $\pm 1$ ) + 6.6%  $\pm 3$ ) + 8.0%  $\pm 4$ ) + 7.2%  $\pm 6$ ) + 44.0%  $\pm 7$ ) + 6.2%  $\pm 8$ )    |
| 8                   | 317.3              | 18.4%  $\pm 3$ ) + 4.8%  $\pm 5$ ) + 20.2%  $\pm 6$ ) + 39.0%  $\pm 7$ ) + 5.2%  $\pm 8$ )                     |
| 9                   | 321.6              | 15.2% 0) + 12.2%  $\pm 2$ ) + 14.8%  $\pm 3$ ) + 5.0%  $\pm 5$ ) + 33.2%  $\pm 6$ ) + 10.2%  $\pm 7$ )         |
| 10                  | 382.0              | 10.6%  $\pm 1$ ) + 23.4%  $\pm 2$ ) + 9.6%  $\pm 4$ ) + 13.2%  $\pm 5$ ) + 33.4%  $\pm 6$ ) + 7.8%  $\pm 7$ )  |
| 11                  | 390.1              | 17.0%  $\pm 1$ ) + 10.0%  $\pm 2$ ) + 33.4%  $\pm 5$ ) + 18.4%  $\pm 6$ ) + 13.2%  $\pm 7$ )                   |
| 12                  | 423.7              | 17.5% 0) + 5.8%  $\pm 3$ ) + 42.2%  $\pm 4$ ) + 11.2%  $\pm 5$ ) + 17.2%  $\pm 6$ )                            |
| 13                  | 426.4              | 15.8%  $\pm 1$ ) + 16.8%  $\pm 3$ ) + 9.8%  $\pm 4$ ) + 39.2%  $\pm 5$ ) + 7.8%  $\pm 6$ )                     |
| 14                  | 478.1              | 49.0%  $\pm 2$ ) + 43.2%  $\pm 4$ ) + 5.8%  $\pm 6$ )                                                          |
| 15                  | 478.2              | 17.6%  $\pm 1$ ) + 57.8%  $\pm 3$ ) + 21.8%  $\pm 5$ )                                                         |
| 16                  | 671.8              | 69.8%  $\pm 1$ ) + 26.2%  $\pm 3$ )                                                                            |

|    |       |                                    |
|----|-------|------------------------------------|
| 17 | 672.0 | 39.3% 0⟩ + 48.4% ± 2⟩ + 11.0% ± 4⟩ |
|----|-------|------------------------------------|

**Table S20.** *Ab initio* results for the  $J=15/2$  multiplet of  $\text{Er}^{3+}$  in (5,0) CNT.

| KDs | $E/\text{cm}^{-1}$ | Wavefunction                               |
|-----|--------------------|--------------------------------------------|
| 1   | 0.0                | 57.0% ± 11/2⟩ + 40.6% ± 15/2⟩              |
| 2   | 18.3               | 7.9% ± 1/2⟩ + 83.6% ± 9/2⟩ + 8.1% ± 15/2⟩  |
| 3   | 51.8               | 97.5% ± 7/2⟩                               |
| 4   | 103.9              | 12.8% ± 1/2⟩ + 8.1% ± 3/2⟩ + 71.2% ± 5/2⟩  |
| 5   | 154.1              | 18.2% ± 1/2⟩ + 63.3% ± 3/2⟩ + 17.5% ± 5/2⟩ |
| 6   | 213.1              | 10.1% ± 9/2⟩ + 89.1% ± 13/2⟩               |
| 7   | 257.5              | 42.0% ± 11/2⟩ + 57.9% ± 15/2⟩              |
| 8   | 289.6              | 68.7% ± 1/2⟩ + 28.3% ± 3/2⟩                |

**Table S21.** *Ab initio* results for the  $J=15/2$  multiplet of  $\text{Er}^{3+}$  in (6,0) CNT.

| KDs | $E/\text{cm}^{-1}$ | Wavefunction                                 |
|-----|--------------------|----------------------------------------------|
| 1   | 0.0                | 63.1% ± 1/2⟩ + 19.6% ± 11/2⟩ + 17.3% ± 13/2⟩ |
| 2   | 57.7               | 66.9% ± 3/2⟩ + 29.9% ± 9/2⟩                  |
| 3   | 98.1               | 57.4% ± 5/2⟩ + 42.6% ± 7/2⟩                  |
| 4   | 233.7              | 23.4% ± 11/2⟩ + 73.4% ± 13/2⟩                |
| 5   | 310.6              | 94.5% ± 15/2⟩                                |
| 6   | 432.               | 33.7% ± 1/2⟩ + 56.9% ± 11/2⟩ + 9.3% ± 13/2⟩  |
| 7   | 529.50             | 32.7% ± 3/2⟩ + 65.0% ± 9/2⟩                  |
| 8   | 579.6              | 42.6% ± 5/2⟩ + 57.4% ± 7/2⟩                  |

**Table S22.** *Ab initio* results for the  $J=15/2$  multiplet of  $\text{Er}^{3+}$  in (7,0) CNT.

| KDs | $E/\text{cm}^{-1}$ | Wavefunction  |
|-----|--------------------|---------------|
| 1   | 0.                 | 99.4% ± 15/2⟩ |
| 2   | 199.63             | 96.4% ± 13/2⟩ |

|   |       |                                     |
|---|-------|-------------------------------------|
| 3 | 246.2 | 91.5%  $\pm 11/2$                   |
| 4 | 284.3 | 90.5%  $\pm 9/2$                    |
| 5 | 346.8 | 11.1%  $\pm 5/2$ + 84.9%  $\pm 7/2$ |
| 6 | 481.1 | 85.8%  $\pm 5/2$ + 11.0%  $\pm 7/2$ |
| 7 | 571.5 | 7.8%  $\pm 1/2$ + 85.2%  $\pm 3/2$  |
| 8 | 646.7 | 85.9%  $\pm 1/2$ + 8.4%  $\pm 3/2$  |

**Table S23.** *Ab initio* results for the  $J=6$  multiplet of  $\text{Tm}^{3+}$  in (5,0) CNT.

| Spin-orbit singlets | $E/\text{cm}^{-1}$ | Wavefunction                                                                                         |
|---------------------|--------------------|------------------------------------------------------------------------------------------------------|
| 1                   | 0.0                | 9.3% 0) + 8.6%  $\pm 1$ ) + 21.4%  $\pm 2$ ) + 17.0%  $\pm 3$ ) + 9.0%  $\pm 5$ ) + 32.2%  $\pm 6$ ) |
| 2                   | 88.9               | 4.8%  $\pm 2$ ) + 4.0%  $\pm 3$ ) + 17.0%  $\pm 5$ ) + 71.2%  $\pm 6$ )                              |
| 3                   | 104.0              | 55.2%  $\pm 1$ ) + 21.0%  $\pm 3$ ) + 16.4%  $\pm 4$ )                                               |
| 4                   | 145.7              | 30.9% 0) + 56.8%  $\pm 2$ ) + 5.4%  $\pm 4$ )                                                        |
| 5                   | 197.1              | 31.8%  $\pm 1$ ) + 20.2%  $\pm 3$ ) + 11.0%  $\pm 5$ ) + 34.6%  $\pm 6$ )                            |
| 6                   | 220.8              | 25.8% 0) + 39.2%  $\pm 1$ ) + 15.6%  $\pm 2$ ) + 14.4%  $\pm 6$ )                                    |
| 7                   | 379.5              | 22.6% 0) + 8.8%  $\pm 1$ ) + 20.4%  $\pm 3$ ) + 38.0%  $\pm 4$ )                                     |
| 8                   | 428.0              | 55.4%  $\pm 2$ ) + 33.4%  $\pm 3$ ) + 9.0%  $\pm 5$ )                                                |
| 9                   | 432.2              | 7.8%  $\pm 3$ ) + 46.0%  $\pm 4$ ) + 31.8%  $\pm 5$ ) + 12.0%  $\pm 6$ )                             |
| 10                  | 451.3              | 9.0%  $\pm 1$ ) + 24.8%  $\pm 3$ ) + 45.2%  $\pm 4$ ) + 12.8%  $\pm 5$ )                             |
| 11                  | 467.2              | 32.0%  $\pm 1$ ) + 26.6%  $\pm 2$ ) + 33.6%  $\pm 3$ ) + 7.2%  $\pm 6$ )                             |
| 12                  | 491.9              | 10.3% 0) + 13.6%  $\pm 3$ ) + 58.2%  $\pm 5$ ) + 11.0%  $\pm 6$ )                                    |
| 13                  | 493.0              | 9.4%  $\pm 1$ ) + 10.2%  $\pm 2$ ) + 33.6%  $\pm 4$ ) + 39.8%  $\pm 5$ ) + 7.0%  $\pm 6$ )           |

**Table S24.** *Ab initio* results for the  $J=6$  multiplet of  $\text{Tm}^{3+}$  in (6,0) CNT.

| Spin-orbit singlets | $E/\text{cm}^{-1}$ | Wavefunction                                                     |
|---------------------|--------------------|------------------------------------------------------------------|
| 1                   | 0.0                | 34.4%  $\pm 1$ ) + 65.2%  $\pm 5$ )                              |
| 2                   | 29.8               | 98.2%  $\pm 5$ )                                                 |
| 3                   | 30.1               | 39.2% 0) + 29.4%  $\pm 2$ ) + 9.4%  $\pm 4$ ) + 21.8%  $\pm 6$ ) |
| 4                   | 75.2               | 43.9% 0) + 29.2%  $\pm 4$ ) + 26.6%  $\pm 6$ )                   |



|    |       |                                                                              |
|----|-------|------------------------------------------------------------------------------|
| 5  | 81.8  | 8.2%  $\pm 1$ ) + 33.0%  $\pm 4$ ) + 53.0%  $\pm 6$ )                        |
| 6  | 85.0  | 51.8%  $\pm 1$ ) + 5.8%  $\pm 3$ ) + 5.2%  $\pm 4$ ) + 29.4%  $\pm 5$ ) + 7. |
| 7  | 194.1 | 76.6%  $\pm 1$ ) + 21.6%  $\pm 3$ )                                          |
| 8  | 255.3 | 13.3% 0) + 68.0%  $\pm 2$ ) + 17.6%  $\pm 6$ )                               |
| 9  | 319.4 | 30.6%  $\pm 2$ ) + 47.6%  $\pm 4$ ) + 21.6%  $\pm 6$ )                       |
| 10 | 353.6 | 7.2%  $\pm 3$ ) + 55.4%  $\pm 4$ ) + 30.2%  $\pm 6$ )                        |
| 11 | 3549  | 20.4%  $\pm 1$ ) + 69.8%  $\pm 3$ ) + 5.2%  $\pm 4$ )                        |
| 12 | 400.3 | 16.4%  $\pm 2$ ) + 72.2%  $\pm 3$ )                                          |
| 13 | 400.3 | 51.4%  $\pm 2$ ) + 21.2%  $\pm 3$ ) + 10.4%  $\pm 4$ ) + 15.0%  $\pm 6$ )    |

**Table S25.** *Ab initio* results for the  $J=6$  multiplet of  $\text{Tm}^{3+}$  in (7,0) CNT.

| Spin-orbit singlets | $E/\text{cm}^{-1}$ | Wavefunction                                                              |
|---------------------|--------------------|---------------------------------------------------------------------------|
| 1                   | 0.0                | 8.0%  $\pm 4$ ) + 87.0%  $\pm 6$ )                                        |
| 2                   | 4.0                | 91.0%  $\pm 6$ )                                                          |
| 3                   | 57.3               | 10.2%  $\pm 2$ ) + 20.4%  $\pm 3$ ) + 20.0%  $\pm 4$ ) + 41.6%  $\pm 5$ ) |
| 4                   | 64.5               | 8.2%  $\pm 1$ ) + 22.6%  $\pm 3$ ) + 19.0%  $\pm 4$ ) + 40.8%  $\pm 5$ )  |
| 5                   | 176.6              | 18.9% 0) + 33.8%  $\pm 2$ ) + 20.6%  $\pm 3$ ) + 9.4%  $\pm 4$ ) + 8.     |
| 6                   | 185.3              | 33.6%  $\pm 1$ ) + 24.6%  $\pm 2$ ) + 15.6%  $\pm 3$ ) + 25.2%  $\pm 4$ ) |
| 7                   | 301.3              | 24.0%  $\pm 1$ ) + 7.2%  $\pm 2$ ) + 12.2%  $\pm 4$ ) + 49.4%  $\pm 5$ )  |
| 8                   | 384.3              | 6.4%  $\pm 1$ ) + 27.2%  $\pm 3$ ) + 13.0%  $\pm 4$ ) + 47.0%  $\pm 5$ )  |
| 9                   | 392.7              | 24.2% 0) + 10.4%  $\pm 2$ ) + 13.4%  $\pm 3$ ) + 46.6%  $\pm 4$ )         |
| 10                  | 559.8              | 28.2%  $\pm 1$ ) + 58.4%  $\pm 3$ ) + 7.8%  $\pm 5$ )                     |
| 11                  | 567.7              | 59.6%  $\pm 2$ ) + 32.8%  $\pm 4$ )                                       |
| 12                  | 721.9              | 38.5% 0) + 17.4%  $\pm 1$ ) + 36.8%  $\pm 2$ )                            |
| 13                  | 725.9              | 12.7% 0) + 64.2%  $\pm 1$ ) + 7.4%  $\pm 2$ ) + 13.2%  $\pm 3$ )          |

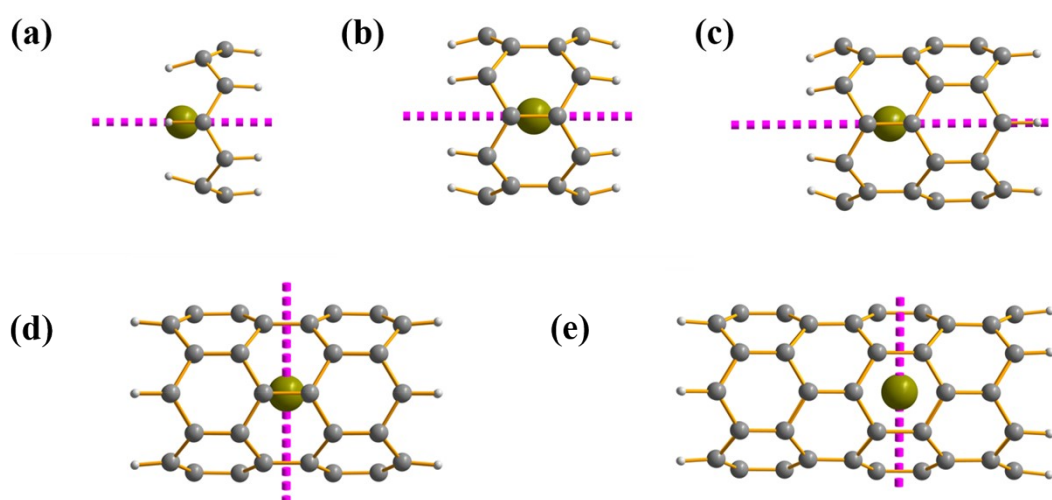

**Figure S5.** Fully optimized structure of Er<sup>3+</sup> in (6,0) CNT of variable length of 1-5 stripes of carbon rings (a-e, respectively). Main magnetic axes are shown by pink dashed lines. Color code: Er<sup>3+</sup> (dark yellow), H (gray) and C (dark gray).

**Table S26.** Energies of the lowest KDs for fully optimized structure of Er<sup>3+</sup> in (6,0) CNT of variable length (1-5 stripes of carbon rings).

| Spin-orbit energies, cm <sup>-1</sup> |       |       |       |       |       |
|---------------------------------------|-------|-------|-------|-------|-------|
|                                       | 1     | 2     | 3     | 4     | 5     |
|                                       | 0.0   | 0.0   | 0.0   | 0.0   | 0.0   |
|                                       | 20.6  | 69.6  | 50.2  | 57.7  | 57.8  |
|                                       | 95.4  | 174.6 | 83.4  | 98.1  | 95.7  |
|                                       | 114.6 | 263.1 | 200.0 | 233.7 | 215.7 |
|                                       | 151.7 | 325.6 | 279.9 | 310.5 | 283.5 |
|                                       | 727.7 | 452.9 | 378.6 | 432.8 | 426.6 |
|                                       | 763.5 | 619.0 | 464.3 | 529.5 | 524.5 |
|                                       | 796.0 | 721.3 | 510.4 | 579.6 | 577.9 |

**Table S27.** The *g* factors of the lowest KDs for fully optimized structure of Er<sup>3+</sup> in (6,0) CNT of variable length (1-5 stripes of carbon rings).

| KDs |                      | 1    | 2    | 3    | 4   | 5   |
|-----|----------------------|------|------|------|-----|-----|
| 1   | <i>g<sub>x</sub></i> | 0.1  | 3.0  | 4.1  | 8.4 | 8.3 |
|     | <i>g<sub>y</sub></i> | 0.2  | 3.0  | 4.1  | 8.4 | 8.3 |
|     | <i>g<sub>z</sub></i> | 14.5 | 13.2 | 11.8 | 0.9 | 1.1 |

|          |       |     |      |      |     |     |
|----------|-------|-----|------|------|-----|-----|
| <b>2</b> | $g_x$ | 7.0 | 0.0  | 0.0  | 0.2 | 0.1 |
|          | $g_y$ | 6.6 | 0.0  | 0.0  | 0.2 | 0.1 |
|          | $g_z$ | 4.5 | 17.3 | 16.8 | 0.2 | 0.3 |
| <b>3</b> | $g_x$ | 9.2 | 0.7  | 1.9  | 9.0 | 8.9 |
|          | $g_y$ | 8.5 | 0.7  | 1.9  | 8.6 | 8.7 |
|          | $g_z$ | 2.0 | 6.2  | 5.0  | 0.1 | 0.2 |
| <b>4</b> | $g_x$ | 0.3 | 0.0  | 0.0  | 4.9 | 5.0 |
|          | $g_y$ | 0.4 | 0.0  | 0.1  | 5.0 | 5.1 |
|          | $g_z$ | 2.9 | 1.6  | 1.6  | 8.4 | 7.8 |

**Table S28.** Energies of the  $J=7/2$  KDs of  $\text{Yb}^{3+}$  in (5,0) CNT.

| Spin-orbit energies,<br>$\text{cm}^{-1}$ |
|------------------------------------------|
| 0.0                                      |
| 32.0                                     |
| 256.2                                    |
| 303.8                                    |

**Table S29.** The  $g$  factors of the  $J=7/2$  KDs of  $\text{Yb}^{3+}$  in (5,0) CNT.

| KDs      |       | $g$ |
|----------|-------|-----|
| <b>1</b> | $g_x$ | 1.6 |
|          | $g_y$ | 1.7 |
|          | $g_z$ | 6.7 |
| <b>2</b> | $g_x$ | 0.1 |
|          | $g_y$ | 0.6 |
|          | $g_z$ | 7.2 |
| <b>3</b> | $g_x$ | 3.6 |
|          | $g_y$ | 3.5 |
|          | $g_z$ | 1.5 |
| <b>4</b> | $g_x$ | 0.7 |
|          | $g_y$ | 0.8 |
|          | $g_z$ | 7.5 |

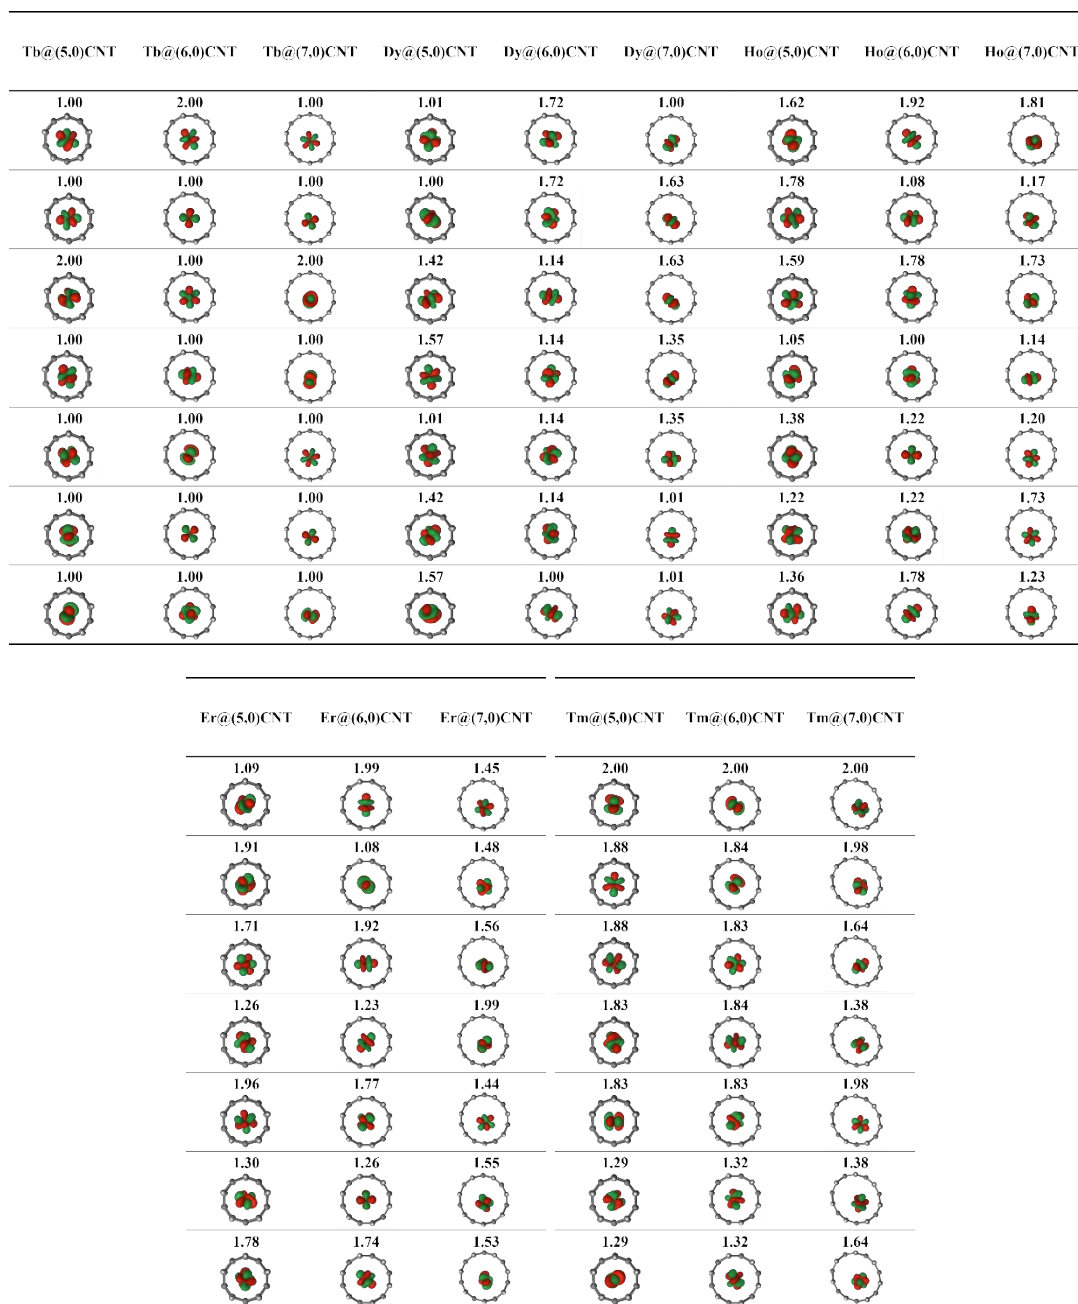

**Figure S6.** The seven active molecular orbitals of  $4f$  type for  $\text{Ln}^{3+}@\text{CNT}$  ( $\text{Ln} = \text{Tb}, \text{Dy}, \text{Ho}, \text{Er}$  and  $\text{Tm}$ ) obtained in CASSCF/RASSI-SO. The isosurface corresponds to a value of 0.04. The number at each plot is the occupation number of the corresponding natural orbital in the ground state.

[1] A. Eatemadi *et al.*, *Nanoscale Research Letters* **9**, 393 (2014)
